criteria. Both data show good agreement in trend and magnitude.

### Acknowledgments

This study is supported by the U.S. Department of Energy, Energy Conversion Technology Utilization Program (ECUT), U.S. National Science Foundation, and the George W. Woodruff School of Mechanical Engineering of Georgia Institute of Technology.

### References

Archard, J. F., 1959, "The Temperature of Rubbing Surfaces," *Wear*, Vol. 2, pp. 438-455.  
 Begelinger, A., and de Gee, A. W. J., 1974, Thin Film Lubrication of Sliding Point Contacts of AISI 52100 Steel, *Wear*, Vol. 28, pp. 103-114.  
 Blok, H., 1970, "The Postulate About the Constancy of Scoring Temperature," *Interdisciplinary Approach to the Lubricating of Concentrated Contacts*, NASA, SP-237, pp. 153-248.  
 Cahoon, J. B., Broughton, W. H., and Kutzak, A. R., 1971, *Metall. Trans.*, Vol. 2, pp. 1979-1983.  
 Davidge, R. W., 1979, *Mechanical Behavior of Ceramics*, Cambridge University Press, p. 90.

De Gee, A. W. J., 1982, "Materials in Tribotechnical Applications," *Tribological Technology*, Vol. 1, Martinus Nijhoff Publishers, London, Peter B. Senholzi, editor, p. 213  
 Griffioen, J. A., Bair, S., and Winer, W. O., 1985, "Infrared Surface Temperature Measurements in a Sliding Ceramic-Ceramic Contact," *Mechanisms and Surface Distress*, Proceedings of the Leed-Lyon Symposium, Butterworths Publishing, D. Dowson, C. M. Taylor, M. Godet and D. Berthe, editors, pp. 238-245.  
 Hamilton, G. M. and Goodman, L. E., 1966, "The Stress Field Created by a Circular Sliding Contact," *ASME Journal of Applied Mechanics*, Vol. 33, pp. 371-376.  
 Marmach, M., Servent, D., Hannink, R. H. J., Murray, M. J., and Swain, M. V., 1983, "Toughened PSZ Ceramics—Their Role as Advanced Engine Components," ASME Technical Paper #830318.  
 Quinn, T. F. J., and Winer, W. O., 1985, "The Thermal Aspects of Oxidational Wear," *Wear*, Vol. 102, pp. 67-90.  
 Samuels, J., and Roberts, S. G., 1985, "The Brittle to Ductile Transition in Silicon," *Proc. Br. Ceram. Soc.*, Vol. 8, pp. 267-272.  
 Ting, Bond-Yen, 1988, "Thermomechanical Wear Theory," Ph.D. dissertation, Georgia Institute of Technology.  
 Ting, Bond-Yen, and Winer, W. O., 1989, "Friction-Induced Thermal Influences in Elastic Contact Between Spherical Asperities," *ASME JOURNAL OF TRIBOLOGY*, Vol. 111, pp. 315-322.  
 Toth, Louis, E., 1971, *Transition Metal Carbides and Nitrides*, Academic Press, New York, p. 169.  
 Zaretsky, E. V., 1988, "Selection of Rolling-Element Bearing Steels for Long-Life Applications," J. J. C. Hoo (ed.), *Effect of Steel Manufacturing Processes on the Quality of Bearing Steels*, ASTM, STP 987.

## DISCUSSION

### A. W. J. de Gee<sup>1</sup>

This is a very interesting paper, which provides strong evidence that the thermal stress parameter, as defined by the authors, in combination with the von Mises yield criterion may indeed provide a reliable estimate of the scuffing load in boundary lubricated sliding contacts between hard materials.

Additional evidence can be found in the following:

Since publishing our paper in *Wear* 1974, transition diagram measurements have been performed with numerous lubricants and additives. The majority of these tests was performed at a sliding speed  $v$ , appreciably above 1.5 m/s, meaning that boundary lubrication conditions did not occur (this lubrication condition applies in the regime between the two solid lines or between the two dashed lines in Fig. 6 of the paper; it is usually called "regime II").

Still data on load carrying capacities  $F_k$  in regime II for steel AISI 52100 couples, lubricated with different lubricants, are available de Gee et al. (1987).

Figure 11 shows such  $F_k$  values as a function of the maximum values of the coefficient of friction  $f$ , measured in regime II, designated  $f^*$ . A typical coefficient of friction  $f$  versus time  $t$

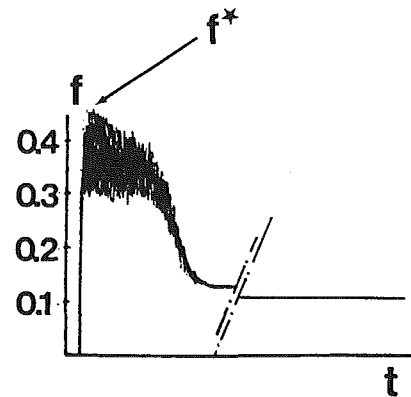

Fig. 12 Characteristic coefficient of friction  $f$  versus time  $t$  tracing in regime II (schematic), with definition of  $f^*$ . The decrease in  $f$  is due to the formation of the iron oxide  $Fe_3O_4$  on the contacting surfaces.

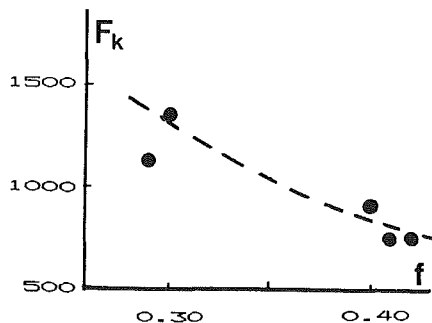

Fig. 11 Load carrying capacity  $F_k$  for lubrication regime II ("II-III transition") for five different lubricants de Gee (1987) as a function of maximum value of the coefficient of friction ( $f^*$ ) in regime II (see Fig. 12 for definition of  $f^*$ ).

tracing is shown in Fig. 12. Note that in de Gee et al. (1987) the average  $f$  values, measured during the high friction period, were given rather than  $f^*$ .

Applying equations (17) and (18) of the paper, it can be calculated that for the data points, shown in Fig. 11, the  $Gt$  values range from 0.89 to 1.04, with an average value of 0.95.

Using the data from Fig. 8 for  $Gt=0.95$ , interpolating for different  $f$ -values and applying equation (19) yields the dashed curve in Fig. 11, which shows the relation between  $F_k$  and  $f$ , according to theory.

It can be concluded that the agreement between this curve and the experimental points is excellent.

### References

Begelinger, A., and de Gee, A. W. J., 1974, "Thin Film Lubrication of Sliding Point Contacts of AISI 52100 Steel," *Wear*, Vol. 28, pp. 103-114.  
 de Gee, A. W. J., Lossie, C. M., and Mens, J. W. M., 1987, "Characterization of Five High-Performance Lubricants in Terms of IRG Transition Diagram Data," *Proceedings I. Mech. Engrs.*, International Tribology Conference, London, June, pp. 427-436.

<sup>1</sup>University of Technology, Delft, The Netherlands.
